# Supplementary material
Source: publisher site journal article supplement (https://www.dovepress.com/article/259889)
Supplement: Supplementary file 1 [file get_supplementary_file.php]

**Table S1 AHF patient and control subject characteristics**

| **Variables** | | **Controls (N = 65)** | **Patients (N = 241)** | | **P value** |
| --- | --- | --- | --- | --- | --- |
| **General Characteristics** | | | | | |
| Age (year) | | 69.21 ± 13.45 | 68.59 ± 13.91 | | 0.728 |
| Male (N, %) | | 40 (61.5%) | 147 (61.0%) | | 0.980 |
| **Physical Exam** | |  |  | |  |
| SBP (mmHg) | | 129 (110, 143) | 128 (112, 149) | | 0.078 |
| DBP (mmHg) | | 79 (69, 92) | 77 (68, 89) | | 0.159 |
| BMI (kg/m2) | | 23.30 (19.32, 26.60) | 23.19 (20.44, 25.75) | | 0.648 |
| Heart rate (bpm) | | 76.5 (68, 89) | 89 (76, 106) | | **<0.001** |
| RR (breaths/min) | | 18 (16, 22) | 20.5 (19, 23) | | **<0.001** |
| MNA-SF score | | 13 (10, 16) | 10 (7, 13) | | **0.003** |
| **Laboratory Data** | |  |  | |  |
| Albumin (g/L) | | 43 (37, 50) | 37 (32, 40) | | **0.008** |
| Creatinine (μmol/L) | | 74.5 (65, 87) | 91 (72, 125) | | **<0.001** |
| eGFR (mL/min) | | 96.4 (71.3, 107.31) | 68.3 (46.0, 90.9) | | **<0.001** |
| NT-proBNP (ng/mL) | | NA | 3980 (2051, 11382) | | N/A |
| Ghrelin (ng/mL) | | 0.84 (0.67, 0.98) | 1.07 (0.85, 1.28) | | **<0.001** |
| Serum sodium (mmol/L) | | 143 (136, 148) | 138 (135, 141) | | **0.025** |
| **Echocardiographic data** |  | | |  | |
| LAD (cm) | | 3.58 (3.41, 3.69) | 4.10 (3.55, 4.60) | | **0.005** |
| LVEDD (cm) | | 4.39 ± 0.47 | 5.08 ± 0.93 | | **<0.001** |
| LVEF (%) | | 62 (58, 66) | 52 (43, 58) | | **<0.001** |

**Note:** continuous variables were reported as mean ± deviation (SD) or median (upper and lower quartile), and categorical variables as percentages (%). P value < 0.05 is shown in bold type. N/A: Not applicable.

**Abbreviations:** SBP: systolic blood pressure, DBP: diastolic blood pressure, BMI:body mass index, RR: respiratory rate, MNA-SF: Mini Nutritional Assessment Short Form, eGFR: estimated glomerular filtration rate, LAD: left atrial dimension, LVEDD: left ventricular end diastolic diameter, LVEF: left ventricular ejection fraction; AHF, acute heart failure.

**Table S2 Association of log NT-proBNP and log ghrelin levels with acute heart failure events**

| Variables | HRs (95% CI) | P value |
| --- | --- | --- |
| Log NT-proBNP | 2.17 (1.66, 2.82) | < 0.001 |
| Log ghrelin | 2.64 (1.11, 6.25) | 0.028 |

**Note:** Adjusted hazard ratios (HRs) and 95% confidence intervals (CI) from multivariate cox proportional hazard models for composite events (all-cause mortality and/or readmission due to HF) are shown. The models were adjusted by age, sex, smoking status, BMI, respiratory rate, heart rate, SBP, DBP, hemoglobin, eGFR, bedside clinical classification, MNA-SF score, serum sodium, and history of HF hospitalization.

**Table S3 Model calibration parameters for acute heart failure events**

| Variables | Hosmer-Lemeshow χ2 | P value |
| --- | --- | --- |
| Model 1 | 11.57 | 0.3149 |
| Model 2 | 11.93 | 0.2894 |
| Model 3 | 16.03 | 0.0989 |
| Model 4 | 15.34 | 0.1201 |

**Note:** Model 1 (reference) included respiratory rate, eGFR, serum sodium, and history of HF hospitalization; Model 2, Model 1 + log NT-proBNP; Model 3, Model 1 + log ghrelin; Model 4, Model 1 + log NT-proBNP + log ghrelin.


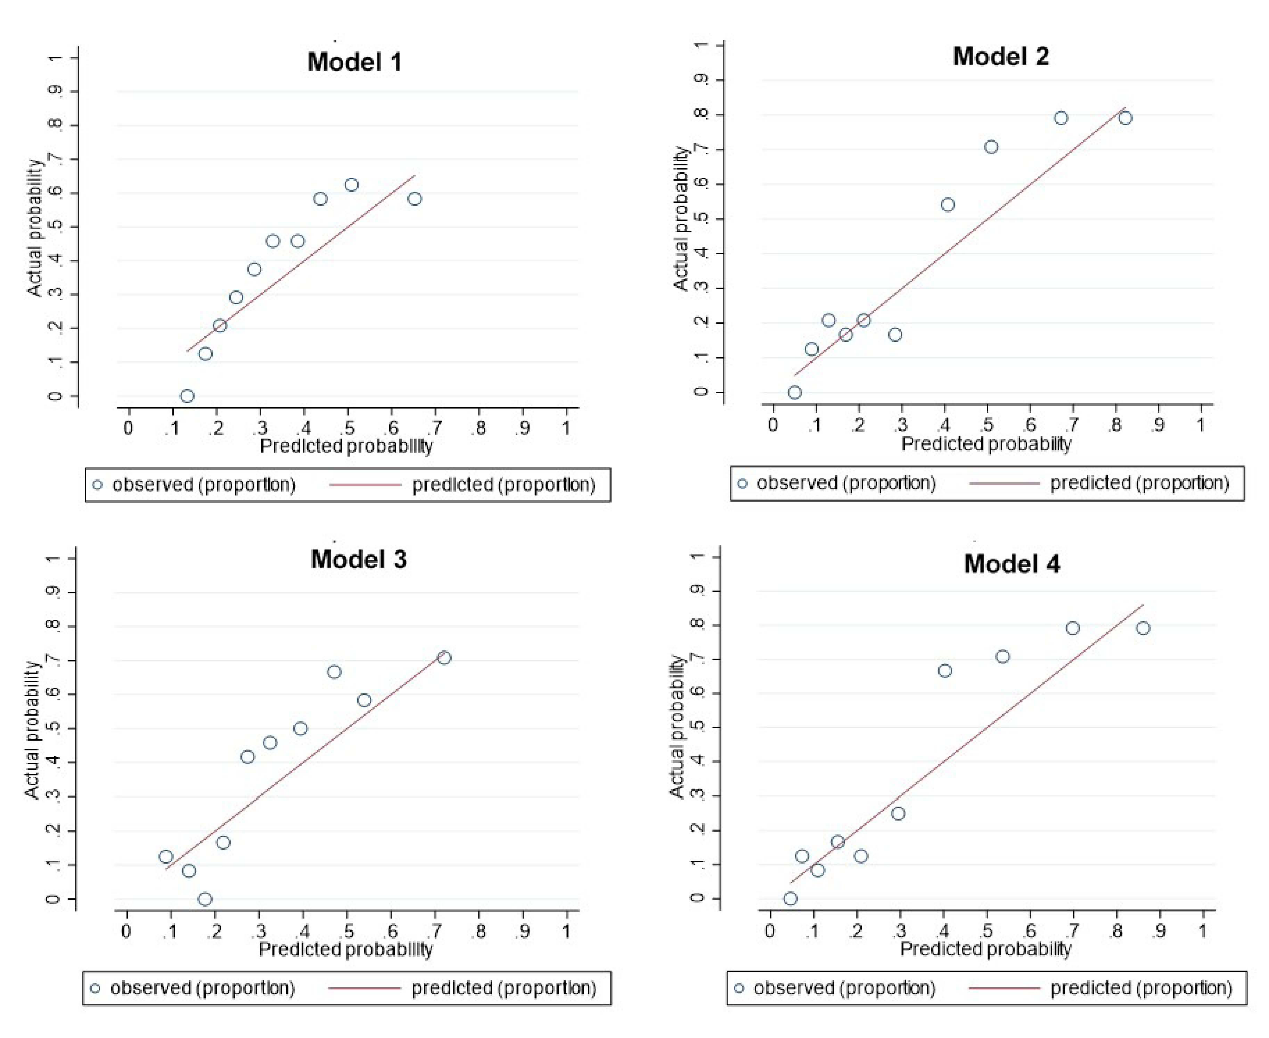


**Figure S1 Calibration plots of each model for acute heart failure events.**

**Note:** Model 1 (reference) includes RR, eGFR, serum sodium, and history of HF hospitalization; Model 2, Model 1 + log NT-proBNP; Model 3, Model 1 + log ghrelin; Model 4, Model 1 + log NT-proBNP + log ghrelin. Hosmer-Lemeshow goodness of fit tests were performed for each model.
